# Supplementary material for: Recycling REEs from the Waste Products of Silius Mine (SE Sardinia, Italy): A Preliminary Study
Source: MDPI journal article supplement (doi:10.3390/su132414000), 2021-12-18
Supplement: s1 [file s1]

**Figure S1.** Selected EDS spectra of REE-bearing minerals shown in Figure 6, together with the spectra of other miscellaneous phases detected in the ten analyzed samples from the old processing plant of Assemini (Cagliari Italy).

#### SAMPLE #1

synchysite-(Ce)

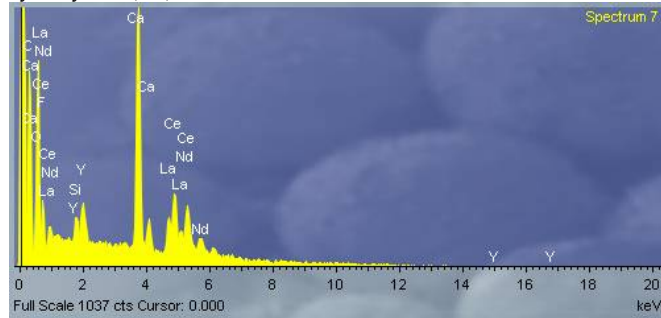

calcite

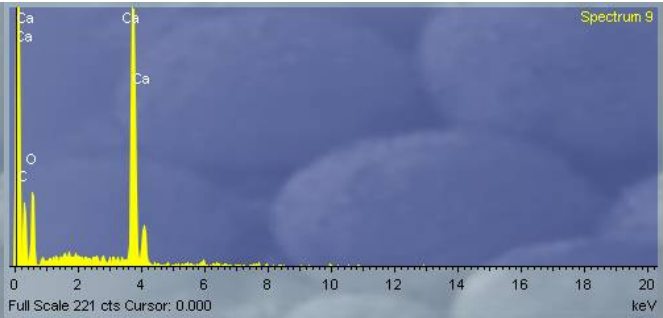

Mg-calcite

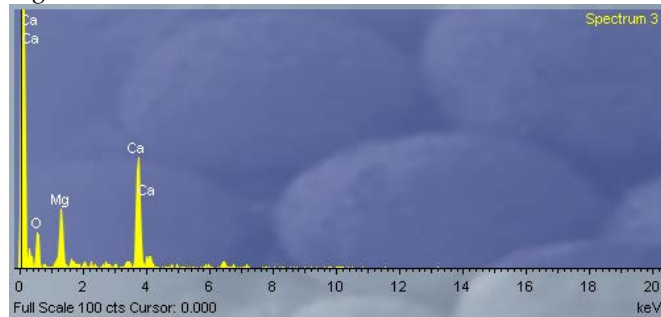

quartz

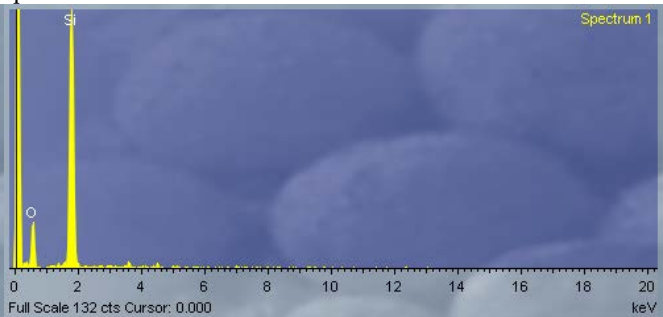

cerussite

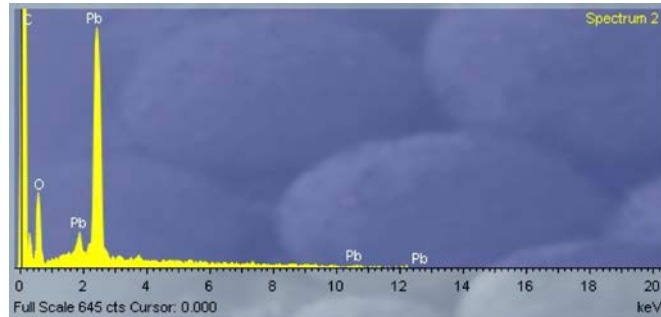

pyrite

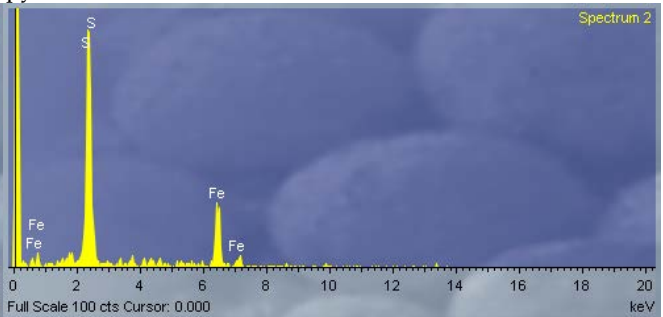

#### SAMPLE #2

synchysite-(Ce)

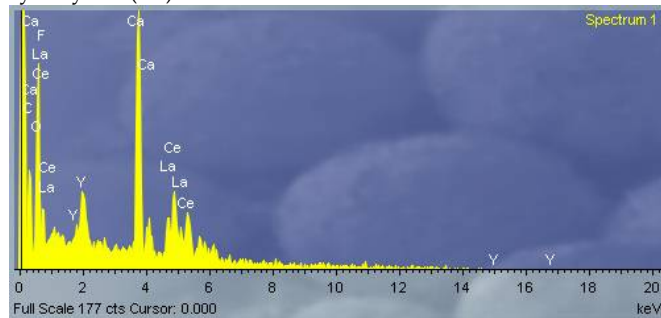

xenotime-(Y)

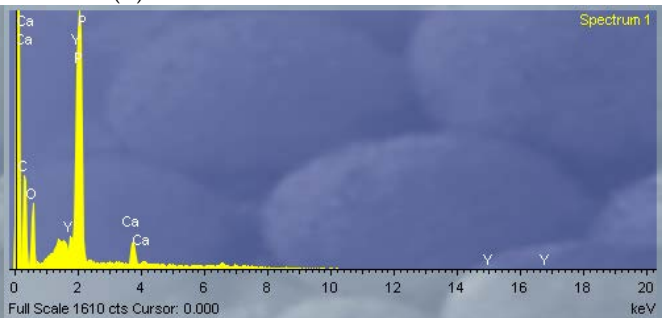

fluorite

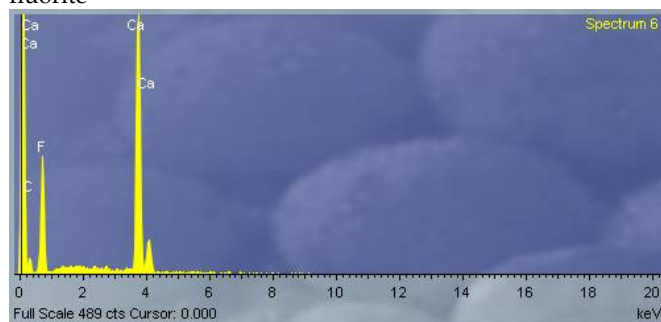

sphalerite

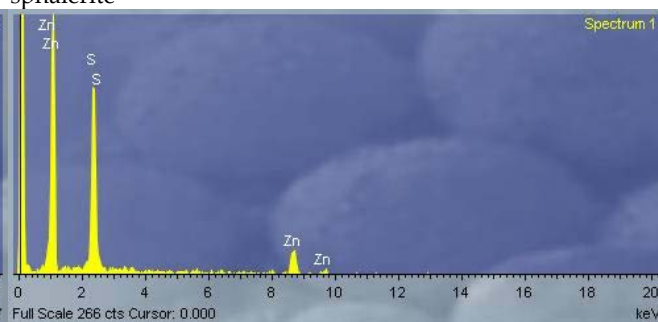

zircon

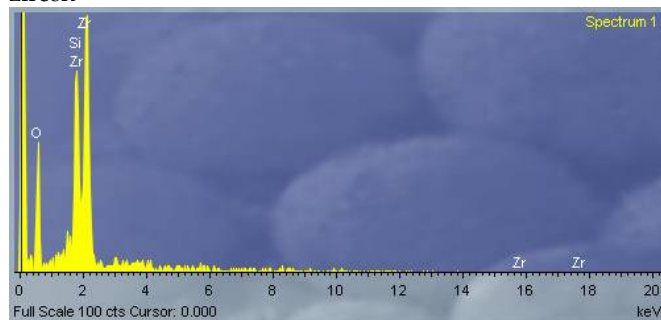

rutile

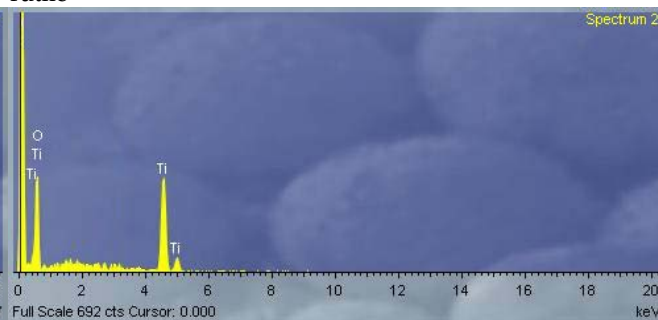

### SAMPLE #3

synchysite-(Ce)

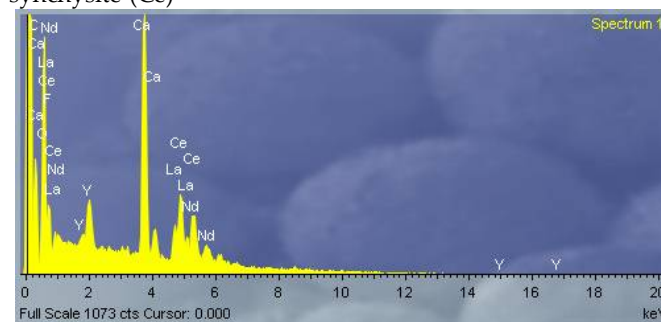

dolomite

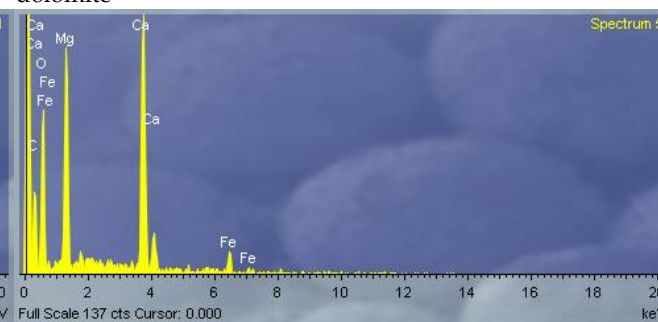

quartz

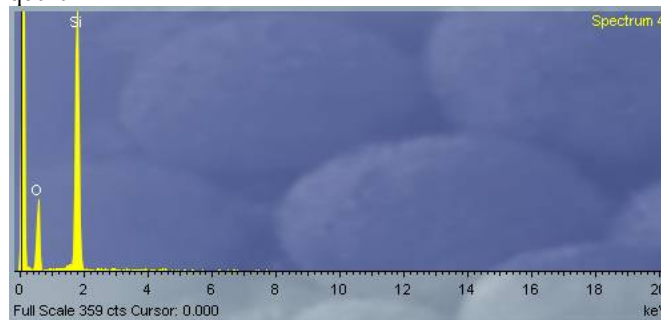

hemimorphite

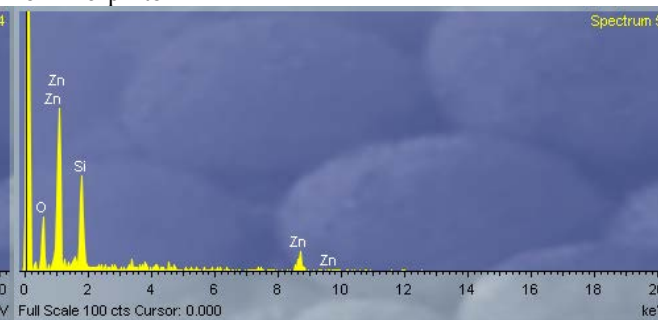

kaolinite

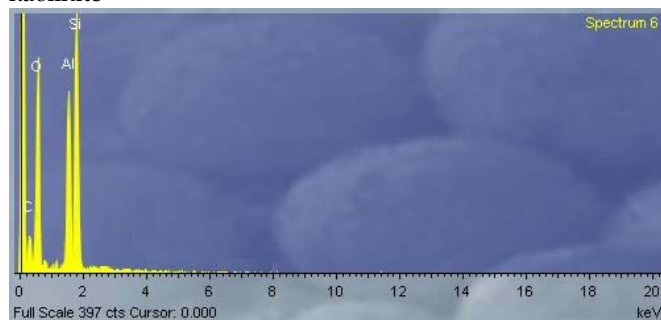

K-feldspar

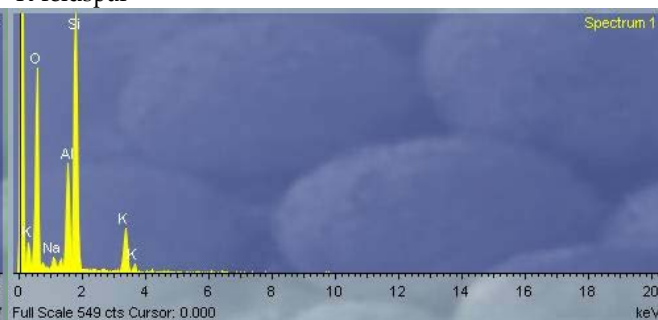

SAMPLE #4

synchysite-(Ce)

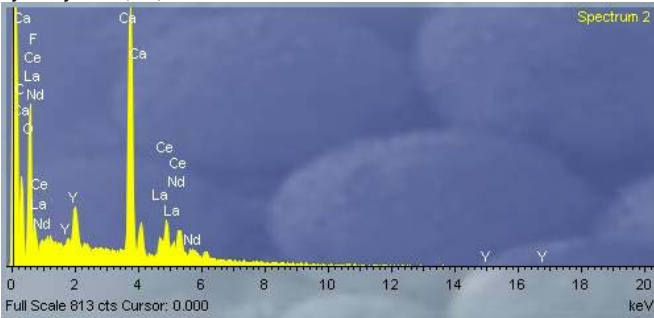

calcite

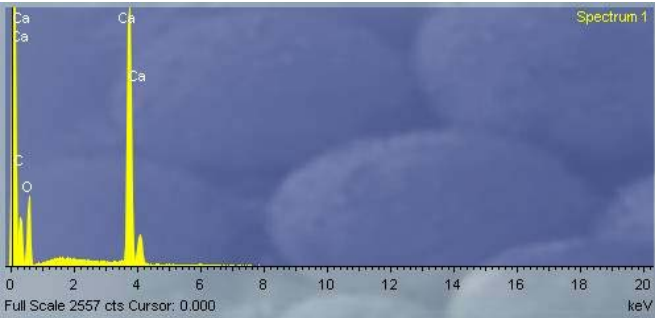

dolomite

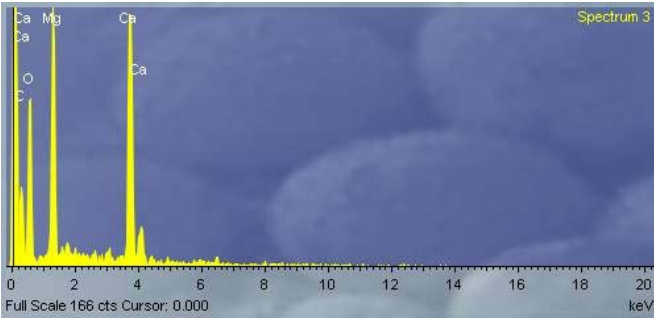

K-feldspar

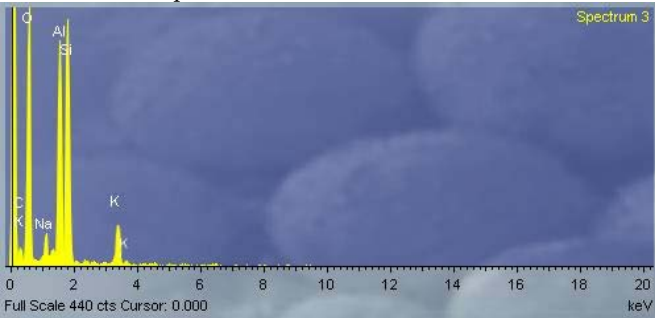

SAMPLE #5

synchysite-(Ce)

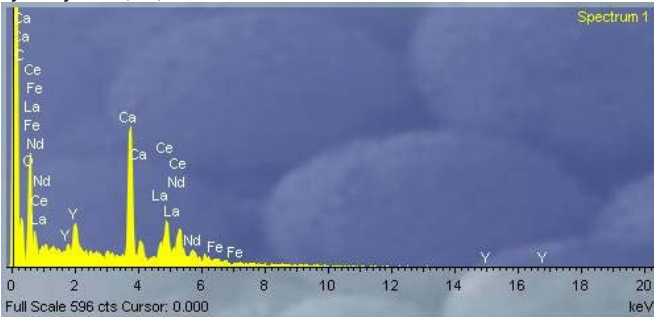

calcite

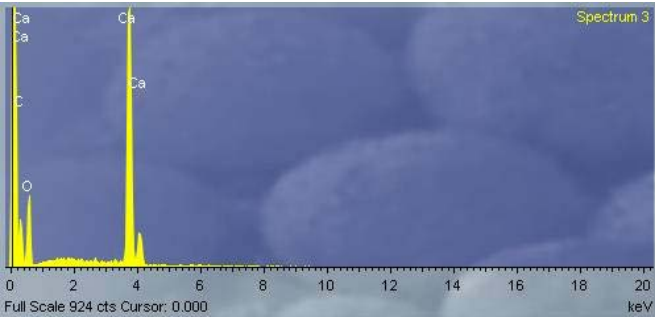

dolomite

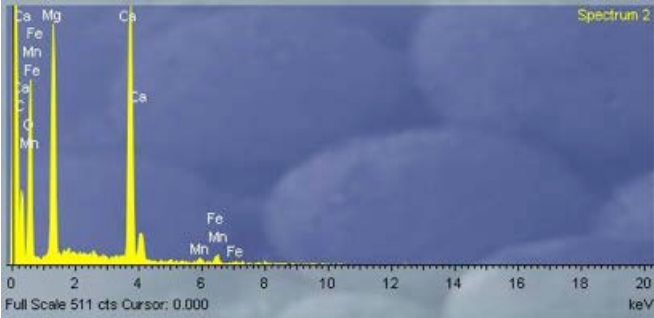

quartz

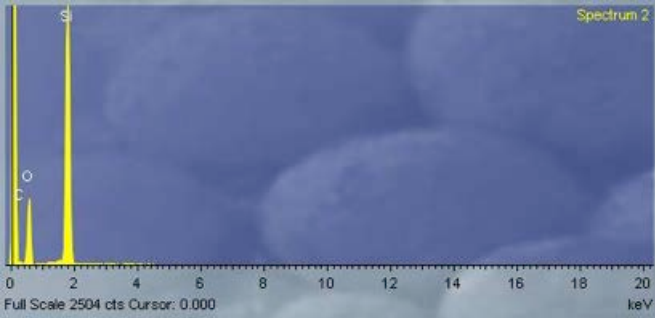

SAMPLE #6

synchysite-(Ce)

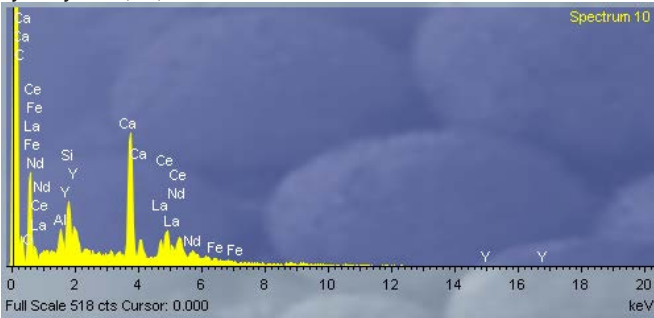

dolomite

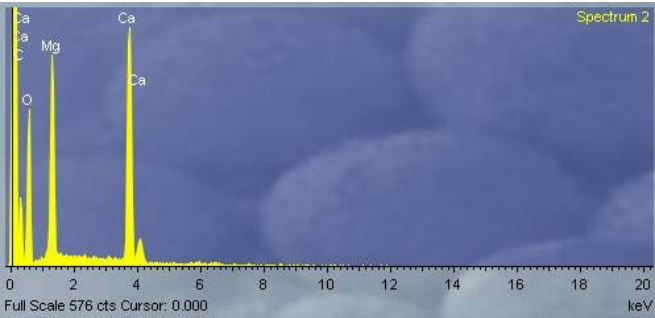

calcite

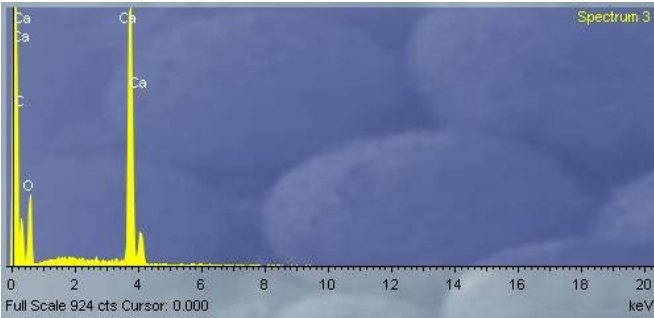

Mg(Fe)-calcite

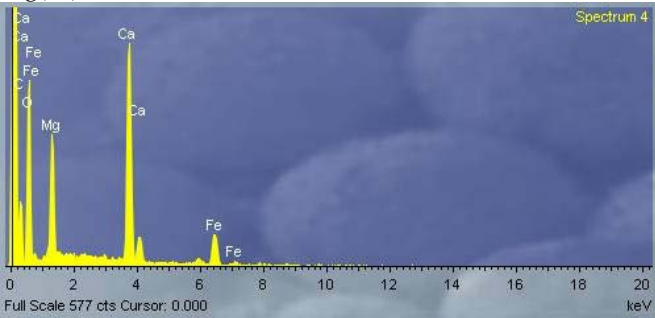

SAMPLE #7

synchysite-(Ce)

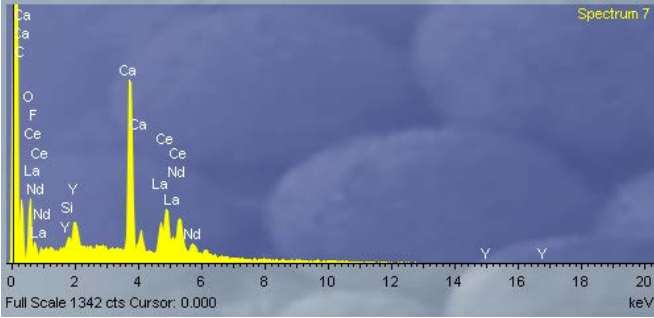

quartz

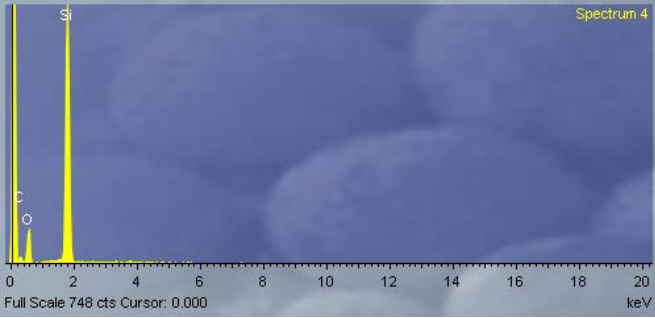

calcite

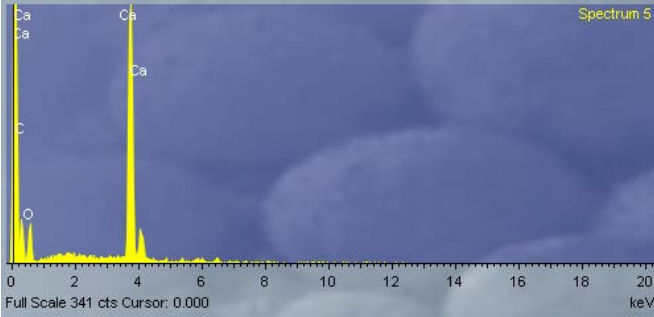

dolomite

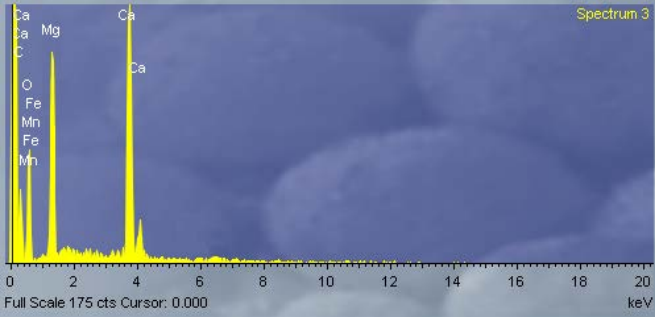



ankerite

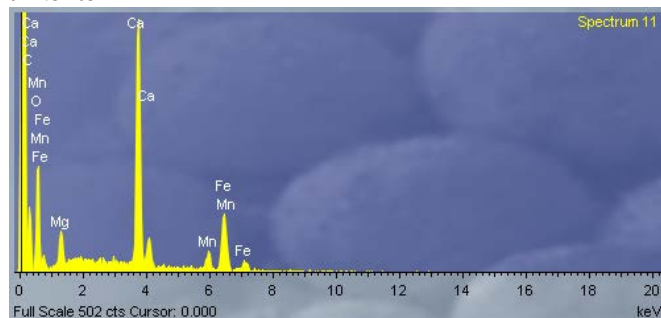

K-feldspar

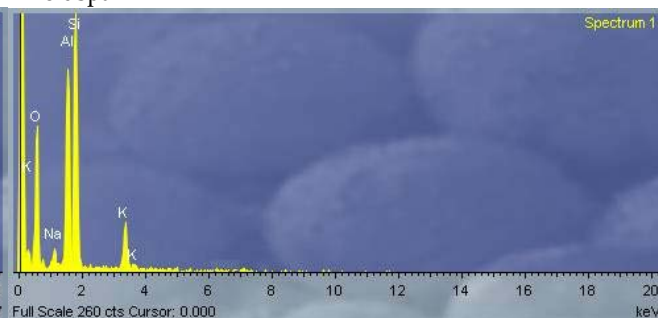

hemimorphite

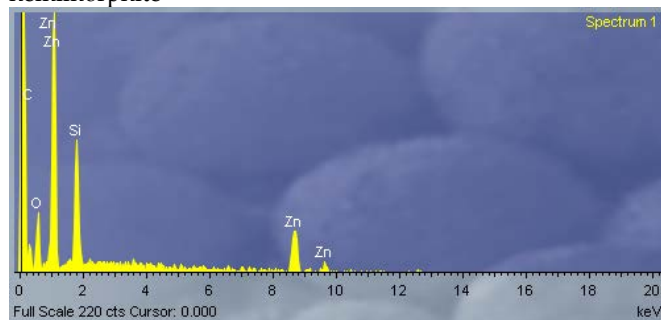

smithsonite

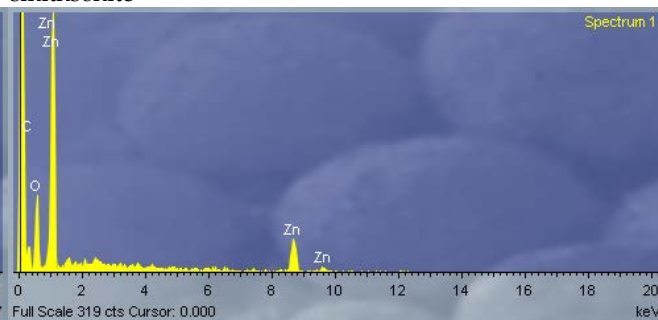**SAMPLE #8**

synchysite-(Ce)

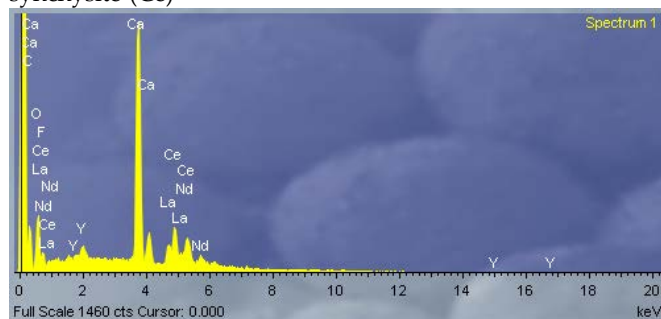

calcite

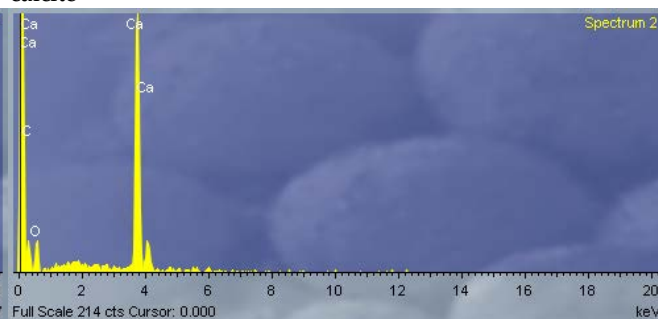

Mg(Fe)-calcite

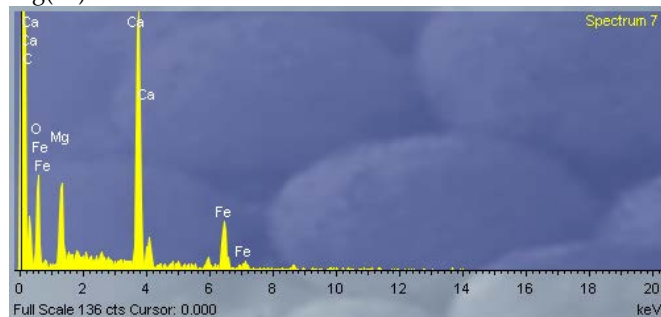

gypsum

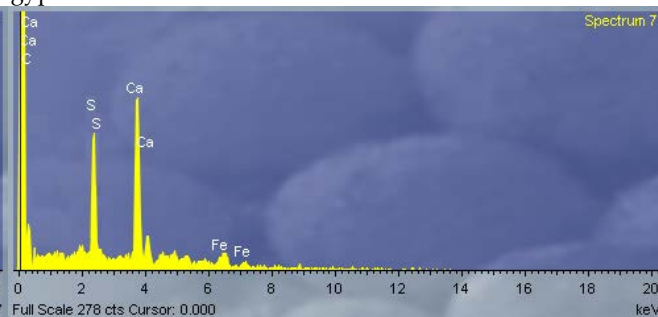

Fe-Mn-oxy-hydroxides

pyrite

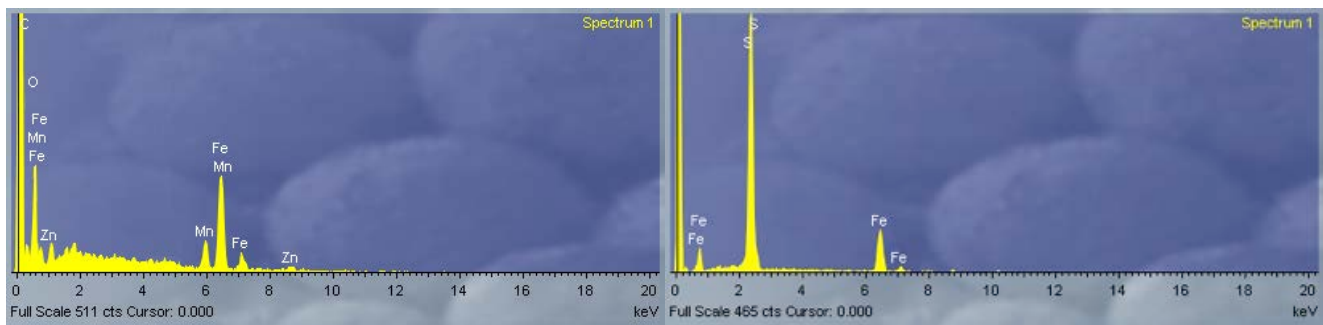

## SAMPLE #9

synchysite-(Ce)

xenotime-(Y)

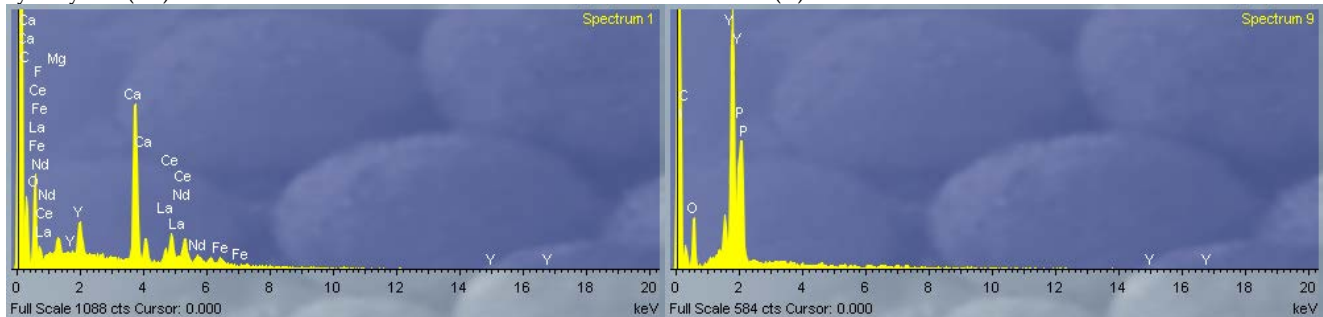

Mg(Fe)-calcite

barite

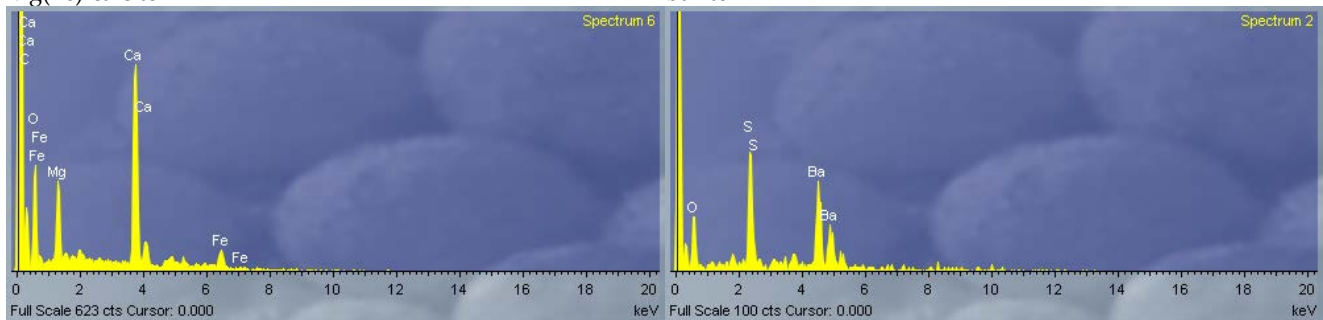

galena

zircon

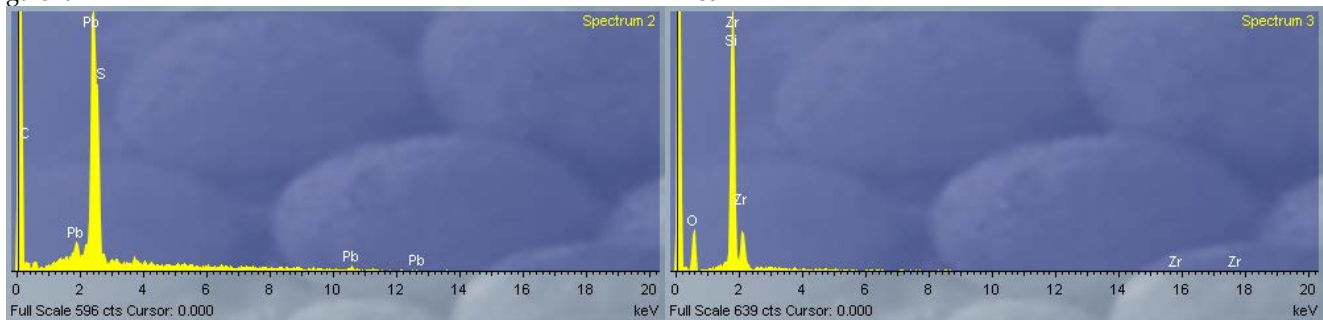

## SAMPLE #10

synchysite-(Ce)

calcite

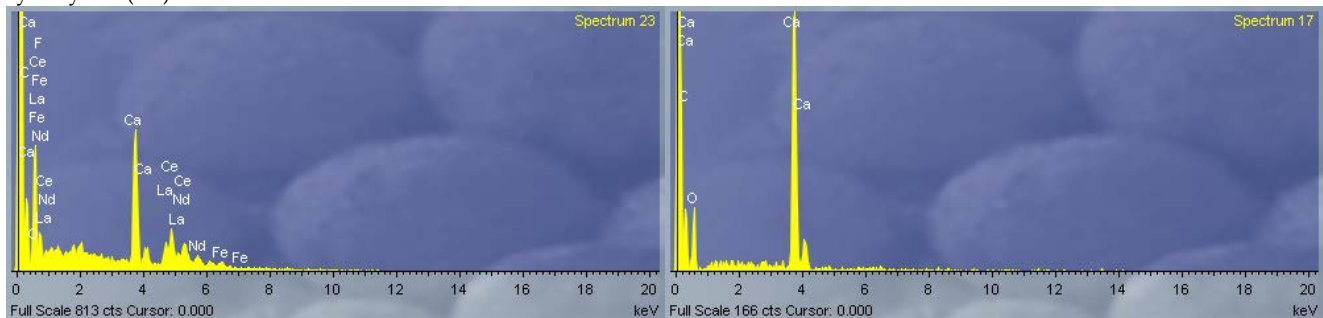

barite

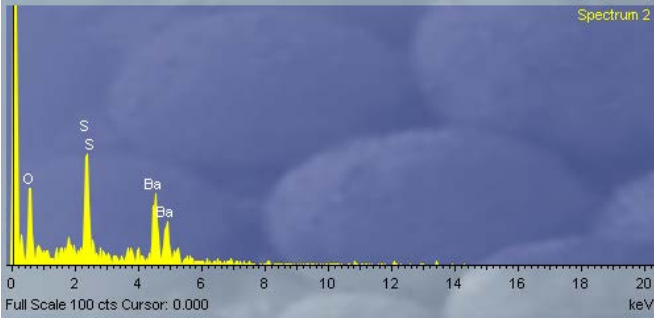

fluorite

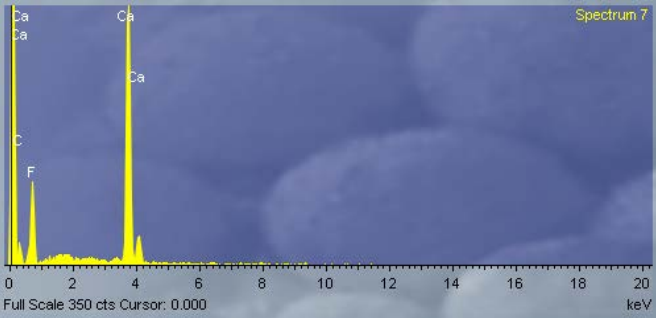

illite

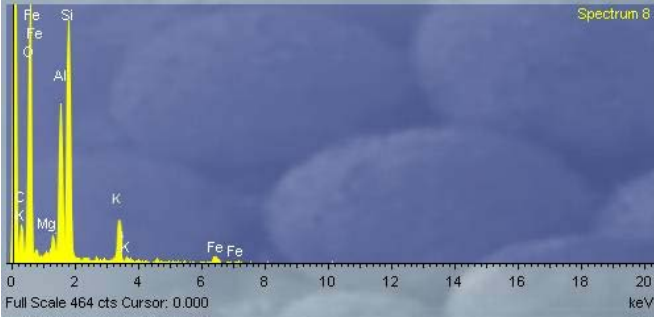

muscovite

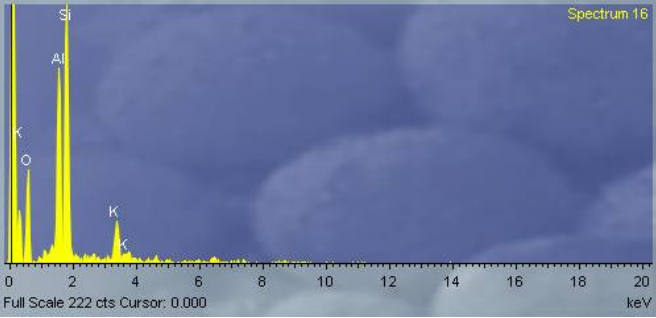

**Table S1.** Chemical composition (EDS analyses) of synchysite-(Ce) found in the samples from Assemini, expressed in weight % of oxides ( $\Sigma_{\text{REO}}$ , sum of REE oxides).

| wt.%                           | Sample # |       |       |       |       |       |       |       |       |       |       |       |       |       |       |       |
|--------------------------------|----------|-------|-------|-------|-------|-------|-------|-------|-------|-------|-------|-------|-------|-------|-------|-------|
|                                | 1        | 1     | 1     | 1     | 2     | 2     | 2     | 3     | 3     | 3     | 4     | 4     | 4     | 5     | 5     | 5     |
| CaO                            | 17.78    | 18.17 | 19.98 | 20.51 | 18.90 | 18.43 | 18.49 | 18.58 | 18.22 | 17.23 | 26.34 | 24.67 | 19.30 | 20.94 | 19.33 | 17.39 |
| MgO                            | 0.38     | 0.03  | 0.84  | 1.20  | 0.00  | 0.13  | 0.50  | 0.00  | 0.49  | 0.49  | 0.05  | 0.00  | 0.18  | 0.27  | 0.00  | 0.49  |
| Al <sub>2</sub> O <sub>3</sub> | 0.40     | 0.09  | 0.14  | 0.00  | 0.10  | 0.00  | 0.00  | 0.12  | 0.00  | 0.54  | 0.25  | 0.63  | 0.00  | 0.00  | 0.38  | 0.00  |
| SiO <sub>2</sub>               | 1.47     | 0.57  | 0.73  | 0.45  | 0.53  | 0.96  | 0.09  | 0.90  | 0.00  | 0.97  | 0.94  | 0.00  | 0.35  | 0.39  | 0.72  | 1.34  |
| Y <sub>2</sub> O <sub>3</sub>  | 4.46     | 3.94  | 6.72  | 3.27  | 2.65  | 4.20  | 3.29  | 4.98  | 3.48  | 2.77  | 6.73  | 5.33  | 5.62  | 2.99  | 8.01  | 8.34  |
| La <sub>2</sub> O <sub>3</sub> | 9.92     | 9.93  | 7.45  | 7.70  | 10.19 | 10.56 | 12.27 | 9.86  | 10.15 | 15.18 | 9.19  | 8.75  | 12.96 | 13.47 | 7.92  | 8.71  |
| Ce <sub>2</sub> O <sub>3</sub> | 19.37    | 21.24 | 17.74 | 18.37 | 17.84 | 20.45 | 23.66 | 20.44 | 17.63 | 23.24 | 18.52 | 16.25 | 22.92 | 19.00 | 14.27 | 17.14 |
| Pr <sub>2</sub> O <sub>3</sub> | 0.63     | 1.21  | 1.12  | 0.00  | 1.51  | 1.19  | 0.00  | 1.92  | 3.87  | 4.64  | 3.67  | 0.01  | 0.17  | 0.00  | 1.90  | 2.89  |
| Nd <sub>2</sub> O <sub>3</sub> | 8.26     | 7.34  | 7.96  | 4.56  | 9.29  | 9.69  | 8.41  | 9.09  | 13.70 | 8.90  | 8.41  | 7.65  | 7.22  | 4.59  | 7.72  | 7.27  |
| Sm <sub>2</sub> O <sub>3</sub> | 1.99     | 0.73  | 1.39  | 0.00  | 2.43  | 2.42  | 4.15  | 1.88  | 3.30  | 2.33  | 1.34  | 4.60  | 0.24  | 2.31  | 1.59  | 0.00  |
| Eu <sub>2</sub> O <sub>3</sub> | 0.53     | 0.17  | 0.03  | 0.00  | 1.06  | 0.00  | 2.47  | 0.17  | 1.35  | 0.00  | 0.76  | 1.77  | 0.91  | 2.17  | 1.08  | 2.01  |
| Gd <sub>2</sub> O <sub>3</sub> | 1.08     | 1.82  | 2.00  | 2.08  | 3.16  | 1.23  | 4.27  | 1.27  | 1.29  | 0.00  | 1.95  | 3.20  | 1.46  | 1.83  | 2.77  | 3.41  |
| Dy <sub>2</sub> O <sub>3</sub> | 1.84     | 1.62  | 0.70  | 2.20  | 0.00  | 1.02  | 0.35  | 0.89  | 2.08  | 0.41  | 1.45  | 0.00  | 0.62  | 0.00  | 0.46  | 0.58  |
| F                              | 6.09     | 4.09  | 6.33  | 6.71  | 4.99  | 4.60  | 4.12  | 6.44  | 4.49  | 7.00  | 3.29  | 4.22  | 5.64  | 3.36  | 3.24  | 4.01  |
| Total                          | 74.21    | 70.96 | 73.12 | 67.05 | 72.66 | 74.87 | 82.07 | 76.55 | 80.06 | 83.69 | 82.89 | 77.08 | 77.59 | 71.31 | 69.39 | 73.58 |
| ⊙ REO                          | 48.09    | 48.00 | 45.11 | 38.18 | 48.13 | 50.74 | 58.88 | 50.50 | 56.86 | 57.46 | 52.02 | 47.56 | 52.11 | 46.35 | 45.72 | 50.36 |

| wt.%                           | Sample # |       |       |       |       |       |       |       |       |       |       |       |       |       |       |       |
|--------------------------------|----------|-------|-------|-------|-------|-------|-------|-------|-------|-------|-------|-------|-------|-------|-------|-------|
|                                | 6        | 6     | 6     | 7     | 7     | 8     | 8     | 8     | 8     | 9     | 9     | 9     | 10    | 10    | 10    | 10    |
| CaO                            | 18.11    | 17.41 | 17.00 | 18.15 | 19.35 | 17.31 | 18.81 | 26.29 | 20.95 | 19.24 | 17.67 | 26.67 | 14.43 | 17.42 | 17.35 | 18.74 |
| MgO                            | 0.00     | 0.00  | 1.04  | 0.00  | 0.00  | 0.11  | 0.00  | 0.25  | 0.48  | 2.42  | 0.12  | 0.19  | 0.00  | 0.71  | 0.00  | 0.35  |
| Al <sub>2</sub> O <sub>3</sub> | 0.00     | 0.19  | 0.55  | 0.00  | 0.22  | 0.27  | 1.03  | 0.56  | 0.00  | 0.00  | 1.15  | 0.30  | 0.38  | 0.33  | 0.00  | 0.00  |
| SiO <sub>2</sub>               | 0.68     | 0.67  | 1.66  | 0.88  | 0.67  | 0.75  | 0.10  | 0.57  | 0.79  | 0.29  | 3.45  | 0.39  | 0.92  | 0.27  | 0.59  | 0.78  |
| Y <sub>2</sub> O <sub>3</sub>  | 5.30     | 5.84  | 8.46  | 6.52  | 5.98  | 6.56  | 6.14  | 1.86  | 7.35  | 5.87  | 0.88  | 2.30  | 2.99  | 5.96  | 4.27  | 8.44  |
| La <sub>2</sub> O <sub>3</sub> | 14.04    | 10.21 | 9.79  | 9.54  | 10.11 | 8.01  | 9.97  | 9.98  | 5.82  | 7.37  | 12.12 | 7.99  | 9.47  | 9.32  | 11.87 | 9.96  |
| Ce <sub>2</sub> O <sub>3</sub> | 22.12    | 20.72 | 17.61 | 18.64 | 17.81 | 16.45 | 19.20 | 20.23 | 14.05 | 16.35 | 17.69 | 15.81 | 18.73 | 19.93 | 22.25 | 20.27 |
| Pr <sub>2</sub> O <sub>3</sub> | 1.42     | 1.74  | 5.34  | 0.58  | 1.22  | 0.68  | 2.08  | 1.07  | 0.12  | 0.73  | 2.12  | 1.92  | 0.00  | 0.60  | 1.45  | 2.44  |
| Nd <sub>2</sub> O <sub>3</sub> | 6.84     | 7.57  | 7.83  | 7.30  | 6.43  | 6.96  | 6.50  | 6.50  | 6.90  | 5.96  | 7.41  | 7.96  | 7.66  | 5.65  | 7.75  | 9.45  |
| Sm <sub>2</sub> O <sub>3</sub> | 2.17     | 1.70  | 3.91  | 1.80  | 1.04  | 2.13  | 1.77  | 0.93  | 1.81  | 0.09  | 0.00  | 1.69  | 1.27  | 0.88  | 0.29  | 3.30  |
| Eu <sub>2</sub> O <sub>3</sub> | 1.49     | 1.96  | 2.21  | 1.27  | 2.21  | 0.79  | 1.30  | 0.76  | 1.33  | 0.50  | 0.10  | 0.00  | 0.00  | 0.89  | 0.00  | 1.83  |
| Gd <sub>2</sub> O <sub>3</sub> | 0.00     | 1.29  | 3.26  | 1.60  | 3.09  | 1.25  | 1.66  | 0.79  | 1.96  | 2.27  | 0.76  | 2.27  | 0.12  | 0.00  | 1.44  | 2.22  |
| Dy <sub>2</sub> O <sub>3</sub> | 0.56     | 1.31  | 1.47  | 0.77  | 0.73  | 1.96  | 0.97  | 0.00  | 1.13  | 0.92  | 1.44  | 0.60  | 0.10  | 1.15  | 0.00  | 0.13  |
| F                              | 4.83     | 6.42  | 6.20  | 3.60  | 3.44  | 3.85  | 2.54  | 3.47  | 4.39  | 3.19  | 3.72  | 3.38  | 5.96  | 4.94  | 4.01  | 9.89  |
| Total                          | 77.55    | 77.02 | 86.33 | 70.66 | 72.29 | 67.08 | 72.09 | 73.26 | 67.10 | 65.20 | 68.64 | 71.47 | 62.02 | 68.04 | 71.26 | 87.81 |
| $\Sigma_{\text{REO}}$          | 53.93    | 52.33 | 59.88 | 48.03 | 48.62 | 44.79 | 49.61 | 42.12 | 40.48 | 40.07 | 42.53 | 40.54 | 40.33 | 44.38 | 49.31 | 58.05 |



**Table S2.** Initial REE abundances (mg·kg<sup>-1</sup>) in the analyzed bulk samples.

| Sample# | Y      | La     | Ce      | Pr    | Nd     | Sm    | Eu   | Gd    | Tb   | Dy    | Ho   | Er   | Tm   | Yb   | Lu   |
|---------|--------|--------|---------|-------|--------|-------|------|-------|------|-------|------|------|------|------|------|
| 1       | 65.90  | 70.00  | 126.30  | 13.59 | 52.2.0 | 12.06 | 5.51 | 14.15 | 1.79 | 9.29  | 1.70 | 4.27 | 0.47 | 3.01 | 0.45 |
| 2       | 68.00  | 67.00  | 118.60  | 13.21 | 50.00  | 11.54 | 5.55 | 13.29 | 1.80 | 9.47  | 1.74 | 3.86 | 0.50 | 3.01 | 0.39 |
| 3       | 57.40  | 56.40  | 101.70  | 11.13 | 44.20  | 9.87  | 4.18 | 11.18 | 1.56 | 8.48  | 1.54 | 3.85 | 0.46 | 2.86 | 0.40 |
| 4       | 62.40  | 59.50  | 108.90  | 11.85 | 46.30  | 10.78 | 4.65 | 12.14 | 1.69 | 9.54  | 1.64 | 3.93 | 0.49 | 3.00 | 0.42 |
| 5       | 91.20  | 100.50 | 180.100 | 19.31 | 75.00  | 15.91 | 7.85 | 18.96 | 2.43 | 13.17 | 2.18 | 5.11 | 0.60 | 3.59 | 0.43 |
| 6       | 56.70  | 58.50  | 105.10  | 11.51 | 46.00  | 9.93  | 4.15 | 11.62 | 1.63 | 8.68  | 1.47 | 3.92 | 0.47 | 2.83 | 0.36 |
| 7       | 47.10  | 54.20  | 100.00  | 10.32 | 40.60  | 9.11  | 3.86 | 10.14 | 1.39 | 7.61  | 1.37 | 3.32 | 0.44 | 2.69 | 0.35 |
| 8       | 65.50  | 71.70  | 132.80  | 14.33 | 54.80  | 12.82 | 5.64 | 13.91 | 1.92 | 10.04 | 1.70 | 4.30 | 0.53 | 2.96 | 0.39 |
| 9       | 104.50 | 84.20  | 156.10  | 17.05 | 66.30  | 15.09 | 6.73 | 18.38 | 2.51 | 13.41 | 2.31 | 5.12 | 0.59 | 3.54 | 0.44 |
| 10      | 53.80  | 51.40  | 92.80   | 10.20 | 38.20  | 8.67  | 2.85 | 10.60 | 1.40 | 8.00  | 1.40 | 3.63 | 0.43 | 2.51 | 0.36 |

**Table S3.** REEs extracted (mg·kg<sup>-1</sup>) in the analyzed samples.

| Sample # | Y     | La   | Ce    | Pr   | Nd    | Sm   | Eu   | Gd   | Tb   | Dy   | Ho   | Er   | Tm    | Yb   | Lu    |
|----------|-------|------|-------|------|-------|------|------|------|------|------|------|------|-------|------|-------|
| 1        | 9.60  | 3.20 | 8.60  | 1.60 | 6.00  | 2.00 | 1.10 | 2.40 | 0.65 | 1.70 | 0.62 | 0.99 | <0.50 | 0.79 | <0.50 |
| 2        | 18.0  | 6.70 | 16.40 | 2.60 | 10.60 | 3.60 | 2.00 | 4.30 | 0.92 | 2.90 | 0.85 | 1.50 | <0.50 | 1.10 | <0.50 |
| 3        | 7.70  | 2.90 | 7.00  | 1.40 | 5.10  | 1.70 | 0.92 | 2.10 | 0.62 | 1.60 | 0.60 | 0.90 | <0.50 | 0.73 | <0.50 |
| 4        | 7.40  | 2.80 | 7.10  | 1.20 | 4.50  | 1.70 | 0.91 | 1.90 | 0.56 | 1.40 | 0.56 | 0.81 | <0.50 | 0.64 | <0.50 |
| 5        | 3.70  | 1.10 | 2.30  | 0.66 | 1.80  | 0.90 | 0.54 | 1.00 | 0.44 | 0.79 | 0.44 | 0.53 | <0.50 | 0.44 | <0.50 |
| 6        | 4.40  | 1.40 | 3.40  | 0.75 | 2.20  | 1.10 | 0.64 | 1.10 | 0.46 | 0.89 | 0.46 | 0.58 | <0.50 | 0.46 | <0.50 |
| 7        | 2.60  | 2.80 | 5.30  | 0.88 | 2.60  | 2.10 | 1.20 | 1.00 | 0.39 | 0.73 | 0.38 | 0.48 | <0.50 | 0.41 | <0.50 |
| 8        | 4.60  | 2.10 | 4.70  | 0.93 | 3.10  | 1.60 | 0.96 | 1.30 | 0.47 | 0.98 | 0.47 | 0.61 | <0.50 | 0.49 | <0.50 |
| 9        | 10.70 | 4.60 | 10.10 | 1.60 | 5.80  | 2.40 | 1.20 | 2.30 | 0.59 | 1.70 | 0.55 | 0.83 | <0.50 | 0.60 | <0.50 |
| 10       | 3.80  | 1.90 | 4.30  | 0.85 | 2.70  | 1.20 | 0.57 | 1.10 | 0.42 | 0.86 | 0.42 | 0.56 | <0.50 | 0.46 | <0.50 |

**Table S4.** REEs extracted (% w/w) in the analyzed samples.

| Sample # | Y  | La | Ce | Pr | Nd | Sm | Eu | Gd | Tb | Dy | Ho | Er | Tm | Yb | Lu |
|----------|----|----|----|----|----|----|----|----|----|----|----|----|----|----|----|
| 1        | 15 | 5  | 7  | 12 | 11 | 17 | 21 | 17 | 36 | 19 | 36 | 23 | -  | 26 | -  |
| 2        | 26 | 10 | 14 | 20 | 21 | 31 | 36 | 32 | 51 | 31 | 50 | 38 | -  | 37 | -  |
| 3        | 13 | 5  | 7  | 12 | 12 | 17 | 22 | 19 | 38 | 19 | 40 | 23 | -  | 25 | -  |
| 4        | 12 | 5  | 7  | 10 | 10 | 16 | 20 | 15 | 33 | 15 | 35 | 21 | -  | 21 | -  |
| 5        | 4  | 1  | 1  | 3  | 2  | 6  | 7  | 5  | 19 | 6  | 20 | 10 | -  | 12 | -  |
| 6        | 8  | 2  | 3  | 7  | 5  | 11 | 15 | 10 | 29 | 10 | 30 | 15 | -  | 17 | -  |

|    |    |   |   |   |   |    |    |    |    |    |    |    |   |    |   |
|----|----|---|---|---|---|----|----|----|----|----|----|----|---|----|---|
| 7  | 6  | 5 | 5 | 9 | 6 | 22 | 32 | 10 | 28 | 10 | 27 | 15 | - | 15 | - |
| 8  | 7  | 3 | 4 | 7 | 6 | 13 | 17 | 9  | 25 | 10 | 27 | 14 | - | 16 | - |
| 9  | 10 | 5 | 6 | 9 | 9 | 16 | 18 | 13 | 23 | 12 | 24 | 16 | - | 17 | - |
| 10 | 7  | 4 | 5 | 8 | 7 | 14 | 20 | 11 | 30 | 11 | 30 | 15 | - | 19 | - |

**Table S5.** Comparison between the amount (mg·kg<sup>-1</sup>) of lanthanide extracted after a first treatment (a) (as in Table S3) and a second one on the same residue (a<sub>R</sub>), for each sample.

| Sample # | Treatment      | Y     | La   | Ce    | Pr   | Nd    | Sm   | Eu   | Gd   | Tb   | Dy   | Ho   | Er   | Tm    | Yb   | Lu    |
|----------|----------------|-------|------|-------|------|-------|------|------|------|------|------|------|------|-------|------|-------|
| 1        | a              | 9.58  | 3.22 | 8.58  | 1.57 | 5.97  | 2.02 | 1.14 | 2.43 | 0.65 | 1.73 | 0.62 | 0.99 | <0.50 | 0.79 | <0.50 |
|          | a <sub>R</sub> | 12.26 | 8.97 | 21.79 | 3.08 | 11.92 | 3.53 | 2.21 | 4.38 | 0.78 | 2.25 | 0.64 | 1.11 | <0.50 | 0.79 | <0.50 |
| 2        | a              | 17.94 | 6.69 | 16.36 | 2.61 | 10.62 | 3.59 | 2.02 | 4.31 | 0.92 | 2.95 | 0.85 | 1.50 | <0.50 | 1.12 | <0.50 |
|          | a <sub>R</sub> | 13.81 | 9.12 | 23.93 | 3.33 | 12.59 | 3.82 | 2.97 | 4.15 | 0.76 | 2.17 | 0.63 | 1.04 | <0.50 | 0.69 | <0.50 |
| 3        | a              | 7.71  | 2.89 | 6.99  | 1.37 | 5.11  | 1.71 | 0.92 | 2.12 | 0.62 | 1.61 | 0.61 | 0.90 | <0.50 | 0.73 | <0.50 |
|          | a <sub>R</sub> | 4.18  | 1.36 | 3.80  | 0.91 | 3.31  | 1.37 | 0.77 | 1.50 | 0.46 | 0.95 | 0.43 | 0.55 | <0.50 | 0.44 | <0.50 |
| 4        | a              | 7.41  | 2.80 | 7.12  | 1.25 | 4.47  | 1.71 | 0.91 | 1.86 | 0.57 | 1.41 | 0.56 | 0.81 | <0.50 | 0.64 | <0.50 |
|          | a <sub>R</sub> | 6.00  | 1.95 | 5.25  | 1.11 | 4.28  | 1.73 | 0.87 | 1.79 | 0.50 | 1.22 | 0.47 | 0.68 | <0.50 | 0.53 | <0.50 |
| 5        | a              | 3.75  | 1.12 | 2.33  | 0.66 | 1.80  | 0.88 | 0.54 | 1.03 | 0.45 | 0.79 | 0.44 | 0.53 | <0.50 | 0.44 | <0.50 |
|          | a <sub>R</sub> | 7.08  | 2.88 | 8.22  | 1.48 | 5.46  | 1.87 | 1.06 | 2.08 | 0.54 | 1.27 | 0.48 | 0.65 | <0.50 | 0.46 | <0.50 |
| 6        | a              | 4.36  | 1.45 | 3.36  | 0.76 | 2.21  | 1.07 | 0.64 | 1.11 | 0.46 | 0.89 | 0.46 | 0.58 | <0.50 | 0.46 | <0.50 |
|          | a <sub>R</sub> | 4.57  | 1.84 | 4.54  | 0.98 | 3.43  | 1.46 | 0.73 | 1.47 | 0.48 | 1.05 | 0.46 | 0.60 | <0.50 | 0.49 | <0.50 |
| 7        | a              | 2.61  | 2.85 | 5.27  | 0.88 | 2.55  | 2.04 | 1.23 | 1.00 | 0.39 | 0.73 | 0.38 | 0.48 | <0.50 | 0.41 | <0.50 |
|          | a <sub>R</sub> | 2.47  | 3.09 | 6.11  | 0.92 | 2.81  | 1.17 | 0.65 | 1.03 | 0.38 | 0.69 | 0.36 | 0.45 | <0.50 | 0.38 | <0.50 |
| 8        | a              | 4.57  | 2.13 | 4.68  | 0.94 | 3.06  | 1.63 | 0.96 | 1.30 | 0.47 | 0.98 | 0.47 | 0.61 | <0.50 | 0.49 | <0.50 |
|          | a <sub>R</sub> | 4.59  | 1.43 | 3.89  | 0.82 | 2.51  | 1.17 | 0.63 | 1.14 | 0.43 | 0.86 | 0.42 | 0.55 | <0.50 | 0.43 | <0.50 |
| 9        | a              | 10.69 | 4.56 | 10.08 | 1.60 | 5.83  | 2.36 | 1.18 | 2.32 | 0.59 | 1.65 | 0.55 | 0.83 | <0.50 | 0.60 | <0.50 |
|          | a <sub>R</sub> | 7.86  | 2.81 | 5.90  | 1.03 | 3.31  | 1.47 | 0.79 | 1.54 | 0.48 | 1.16 | 0.47 | 0.66 | <0.50 | 0.50 | <0.50 |
| 10       | a              | 3.78  | 1.88 | 4.31  | 0.85 | 2.75  | 1.18 | 0.57 | 1.11 | 0.42 | 0.86 | 0.42 | 0.56 | <0.50 | 0.46 | <0.50 |
|          | a <sub>R</sub> | 1.98  | 1.18 | 2.25  | 0.53 | 1.23  | 0.68 | 0.40 | 0.64 | 0.36 | 0.53 | 0.36 | 0.42 | <0.50 | 0.37 | <0.50 |

**Table S6.** REEs extracted (mg·kg<sup>-1</sup>) in the analyzed samples by microwave mineralization.

[illegible]
